# Supplementary material
Source: publisher site journal article supplement (https://www.dovepress.com/article/439131)
Supplement: Supplementary file 1 [file get_supplementary_file.php]

**Supplemental Table 1.** Comparison of each item of attention/working memory and language between FOG+ and FOG- patients with education stratification.

|  | FOG+ | FOG- | P |
| --- | --- | --- | --- |
| All participants |  |  |  |
| Attention/Working memory |  |  |  |
| target detection task | 0.88 ± 0.323 | 0.93 ± 0.258 | 0.392 |
| serial sevens | 2.48 ± 0.577 | 2.59 ± 0.523 | 0.269 |
| digit forward/backward | 1.88 ± 0.323 | 1.94 ± 0.232 | 0.264 |
| Language |  |  |  |
| naming | 3 ± 0 | 3 ± 0 | N/A |
| sentence repetition | 0.77 ± 0.783 | 0.93 ± 0.704 | 0.244 |
| Composite measure | 5.98 ± 1.306 | 6.39 ± 1.102 | 0.060 |
| *≤* 6 years |  |  |  |
| Attention/Working memory |  |  |  |
| target detection task | 0.85 ± 0.366 | 0.96 ± 0.209 | 0.260 |
| serial sevens | 2.20 ± 0.616 | 2.39 ± 0.583 | 0.302 |
| digit forward/backward | 1.80 ± 0.410 | 1.96 ± 0.209 | 0.135 |
| Language |  |  |  |
| naming | 3 ± 0 | 3 ± 0 | N/A |
| sentence repetition | 0.35 ± 0.587 | 0.74 ± 0.752 | 0.069 |
| Composite measure | 5.20 ± 1.240 | 6.04 ± 1.261 | **0.033** |
| 7-12 years |  |  |  |
| Attention/Working memory |  |  |  |
| target detection task | 0.92 ± 0.282 | 0.92 ± 0.277 | 0.976 |
| serial sevens | 2.63 ± 0.495 | 2.65 ± 0.484 | 0.854 |
| digit forward/backward | 1.92 ± 0.282 | 1.95 ± 0.229 | 0.658 |
| Language |  |  |  |
| naming | 3 ± 0 | 3 ± 0 | N/A |
| sentence repetition | 0.96 ± 0.806 | 1.00 ± 0.707 | 0.832 |
| Composite measure | 6.33 ± 1.129 | 6.51 ± 1.017 | 0.520 |
| >12 years |  |  |  |
| Attention/Working memory |  |  |  |
| target detection task | 0.88 ± 0.354 | 0.91 ± 0.302 | 0.824 |
| serial sevens | 2.75 ± 0.463 | 2.82 ± 0.405 | 0.737 |
| digit forward/backward | 2.00 ± 0.000 | 1.91 ± 0.302 | 0.409 |
| Language |  |  |  |
| naming | 3 ± 0 | 3 ± 0 | N/A |
| sentence repetition | 1.25 ± 0.707 | 1.09 ± 0.539 | 0.584 |
| Composite measure | 6.88 ± 0.991 | 6.73 ± 0.905 | 0.740 |

**Note**: Significant results are highlighted in bold (p<0.05).

**Abbreviations**: N/A, not applicable.

**Supplemental Table 2.** Logistic regression analysis for the association of the composite cognitive measure with FOG in PD patients with education stratification.

|  | OR (95% CI) | P |
| --- | --- | --- |
| All participants |  |  |
| Model 1 | 0.757 (0.552-1.038) | 0.084 |
| Model 2 | 0.754 (0.549-1.035) | 0.081 |
| Model 3 | 0.744 (0.538-1.030) | 0.075 |
| *≤* 6 years |  |  |
| Model 1 | 0.575 (0.338-0.979) | **0.042** |
| Model 2 | 0.570 (0.317-1.027) | 0.061 |
| Model 3 | 0.600 (0.350-1.030) | 0.064 |
| 7-12 years |  |  |
| Model 1 | 0.858 (0.510-1.442) | 0.562 |
| Model 2 | 0.882 (0.515-1.510) | 0.647 |
| Model 3 | 0.796 (0.458-1.382) | 0.417 |
| >12 years |  |  |
| Model 1 | 0.911 (0.289-2.873) | 0.874 |
| Model 2 | 0.895 (0.275-2.913) | 0.854 |
| Model 3 | 0.958 (0.240-3.825) | 0.951 |

**Notes**: Significant results are highlighted in bold (p<0.05).

Model 1: disease duration and Attention-C were included as co-variables.

Model 2: disease duration, H-Y stage, MDS-UPDRS III score, and Attention-C were included as co-variables.

Model 3: disease duration, HAMA score, HAMD score, and Attention-C were included as co-variables.

**Abbreviations**: OR, odds ratio; CI, confidence interval
